# Supplementary material
Source: MDPI journal article supplement (https://www.mdpi.com/2073-4441/13/23/3448)
Supplement: s1 [file s1]

## **Supplementary material for:**

### **The relative importance of human disturbance, environmental and spatial factors on the community composition of wetland birds**

Seid Tiku Mereta<sup>1\*</sup>, Pieter Lemmens<sup>2†</sup>, Luc De Meester<sup>2</sup>, Peter L.M. Goethals<sup>3</sup>, Pieter Boets<sup>3,4</sup>

<sup>1</sup>Department of Environmental Health Science and Technology, Jimma University, P.O. Box 378, Jimma, Ethiopia

<sup>2</sup>Laboratory of Aquatic Ecology, Evolution and Conservation, KU Leuven., Ch. Deberiotstraat 32, B-3000 Leuven, Belgium

<sup>3</sup>Laboratory of Environmental Toxicology and Aquatic Ecology, Department of Animal Sciences and Aquatic Ecology, Ghent University, Coupure Links 653, Building F, B-9000 Ghent, Belgium

<sup>4</sup>Provincial Centre of Environmental Research, Godshuizenlaan 95, 9000 Ghent, Belgium

\*corresponding author: [seidtiku@yahoo.com](mailto:seidtiku@yahoo.com)

#### **Containing:**

Results of Environmental data

List of the observed bird species

Criteria used to quantify the magnitude human disturbance

Results of variation partitioning analyses on bird community composition

## SUPPLEMENTARY INFORMATION

**Table S1.** Overview of key wetland characteristics and mean (minimum, maximum) values for local environmental variables for each wetland across sampling sites, seasons (wet and dry) and years (2010 and 2011). Permanency: 1 = Temporary; 2 = Semi-permanent; 3 = Permanent. Abbreviation environmental variables: TON = total organic nitrogen;  $\text{NH}_4^+$  = ammonium;  $\text{NO}_3^-$  = nitrate; TP = total phosphorus;  $\text{PO}_4^{3-}$  = orthophosphate;  $\text{BOD}_5$  = Five day Biochemical Oxygen Demand; COD = Chemical Oxygen Demand; EC = Electric Conductivity; pH = logarithmic measure of hydrogen ion concentration.

| Variables                                | Kitto             | Kofe               | Boye              | Awetu            | Haro 1             | Haro 2            | Haro 3             | Haro 4             | Bulbul            | Balawajo         |
|------------------------------------------|-------------------|--------------------|-------------------|------------------|--------------------|-------------------|--------------------|--------------------|-------------------|------------------|
| Permanency                               | 3                 | 3                  | 3                 | 3                | 2                  | 2                 | 2                  | 1                  | 2                 | 1                |
| Area (hectare)                           | 95                | 110                | 92                | 15               | 5                  | 6                 | 10                 | 26                 | 8                 | 20               |
| No. of sampling sites                    | 14                | 14                 | 8                 | 7                | 3                  | 4                 | 3                  | 3                  | 3                 | 3                |
| Water depth (m)                          | 0.6<br>(0.1-1.8)  | 0.26<br>(0.02-0.8) | 0.7<br>(0.05-2.3) | 0.7<br>(0.4-1.2) | 0.5<br>(0.2-1)     | 0.5<br>(0.2-0.8)  | 0.4<br>(0.05-0.8)  | 0.35 (0.18-0.4)    | 0.7<br>(0.2-1.5)  | 0.36<br>(0.14-1) |
| Sludge depth (m)                         | 0.5<br>(0.04-1.4) | 0.8<br>(0.17-1.6)  | 0.7<br>(0.02-3.2) | 0.4<br>(0.3-1)   | 0.32<br>(0.05-0.8) | 0.36<br>(0.1-0.8) | 0.34<br>(0.15-0.8) | 0.21<br>(0.2-0.25) | 0.3<br>(0.0-0.7)  | 0.5<br>(0.2-0.9) |
| Water temperature (°C)                   | 20<br>(16-24)     | 22.5<br>(18-31)    | 22<br>(19-25)     | 20<br>(18-23)    | 23<br>(20.5-30)    | 27<br>(23-33)     | 23<br>(18.8-27)    | 25<br>(20-31)      | 22.7<br>(21-27)   | 23<br>(20-26)    |
| pH                                       | 7.2<br>(6.7-8.1)  | 6.7<br>(6-7.6)     | 6.8<br>(6.6-7.2)  | 7.1<br>(7-7.5)   | 7<br>(6-9.3)       | 7.8<br>(6.8-9.6)  | 7.5<br>(6.8-9.2)   | 7.5<br>(6.8-9.1)   | 7.6<br>(6.6-9.8)  | 7<br>(6.6-7.5)   |
| DO (mg/l)                                | 4.6<br>(0.4-7.5)  | 3.1<br>(0.2-7.6)   | 2.4<br>(0.5-6.6)  | 4.4<br>(0.5-7.2) | 3.2<br>(0.9-9.5)   | 7.6<br>(4.3-11.3) | 6<br>(3.4-12.7)    | 6.8<br>(2.8-12.8)  | 5.5<br>(2.2-10)   | 4.2<br>(1.5-6.5) |
| DO saturation (%)                        | 62<br>(5-93)      | 44<br>(1.8-107)    | 33<br>(7-84)      | 60<br>(8-95)     | 44<br>(4-151)      | 117<br>(55-197)   | 88<br>(49-195)     | 105<br>(40-213)    | 80<br>(31-148)    | 60<br>(22-97)    |
| EC ( $\mu\text{S}/\text{cm}$ )           | 123<br>(60-215)   | 104<br>(26-293)    | 151<br>(59-246)   | 138<br>(79-220)  | 119<br>(69-294)    | 133<br>(69-294)   | 150<br>(72-292)    | 79<br>(60-109)     | 82<br>(67-113)    | 102<br>(62-231)  |
| Chlorophyll a ( $\mu\text{g}/\text{l}$ ) | 12<br>(11-13.5)   | 12<br>(11-27)      | 12.9<br>(11-20.8) | 12<br>(11-12.3)  | 15<br>(12.5-20)    | 14.5<br>(12-16)   | 21<br>(12.6-66)    | 18.8<br>(13-29)    | 15.4<br>(12-21.9) | 12<br>(11.7-13)  |

|                                      |                    |                    |                     |                     |                     |                     |                    |                    |                    |                    |
|--------------------------------------|--------------------|--------------------|---------------------|---------------------|---------------------|---------------------|--------------------|--------------------|--------------------|--------------------|
| TON (mg/l)                           | 1.87<br>(0.04-13)  | 4.4<br>(0.1-34)    | 2.7<br>(0.05-19)    | 2.4<br>(0.8-7.4)    | 2.6<br>(0.13-9)     | 6.5<br>(0.8-29)     | 6.3<br>(1-19.5)    | 7<br>(0.9-21.5)    | 3.6<br>(1-8.4)     | 5.6<br>(0.4-12)    |
| NH <sub>4</sub> (mg/l)               | 0.19<br>(0.01-0.8) | 0.3<br>(0.01-2)    | 0.16<br>(0.01-1.1)  | 0.4<br>(0.03-1.6)   | 0.1<br>(0.01-0.3)   | 0.1<br>(0.01-0.3)   | 0.1<br>(0.01-0.3)  | 0.16<br>(0.03-0.3) | 0.9<br>(0.01-5)    | 0.46<br>(0.02-1.1) |
| NO <sub>3</sub> (mg/l)               | 2.73<br>(0.06-12)  | 0.7<br>(0.01-4)    | 0.7<br>(0.03-2.6)   | 1<br>(0.16-6)       | 0.9<br>(0.05-3)     | 1.4<br>(0.05-5.4)   | 1.2<br>(0.13-2.6)  | 1.7<br>(0.08-4.9)  | 0.6<br>(0.13-1.8)  | 1<br>(0.1-2.9)     |
| TP (mg/l)                            | 0.11<br>(0.03-0.5) | 0.08<br>(0.01-0.4) | 0.13<br>(0.01-0.5)  | 0.4<br>(0.13-1.2)   | 0.24<br>(0.01-0.5)  | 0.25 (0.02-<br>0.6) | 0.2<br>(0.01-0.6)  | 0.6<br>(0.06-1.2)  | 0.45<br>(0.03-1.1) | 0.3<br>(0.05-0.7)  |
| PO <sub>4</sub> <sup>3-</sup> (mg/l) | 0.07<br>(0.01-0.3) | 0.34<br>(0.01-5.4) | 0.08 (0.01-<br>0.8) | 0.14 (0.02-<br>0.6) | 0.07 (0.01-<br>0.2) | 0.06 (0.01-<br>0.2) | 0.07<br>(0.01-0.2) | 0.3<br>(0.04-0.7)  | 0.1<br>(0.05-0.2)  | 0.1<br>(0.02-0.2)  |
| BOD <sub>5</sub> (mg/l)              | 10<br>(2.2-40)     | 16.3<br>(1-66)     | 28.4<br>(1.2-158)   | 40<br>(5-113)       | 28<br>(4.5-62)      | 24<br>(3-54)        | 61<br>(1.8-488)    | 25<br>(8-56)       | 76<br>(9-225)      | 19<br>(2-58)       |
| COD (mg/l)                           | 17<br>(4-57)       | 27<br>(4-89)       | 47.3<br>(3.5-221)   | 60<br>(8-168)       | 50<br>(9-105)       | 40<br>(7.8-81)      | 94<br>(2.8-728)    | 40<br>(13-81)      | 136<br>(18-408)    | 28<br>(3.8-79)     |
| Vegetation cover<br>(%)              | 80<br>(10-100)     | 74<br>(10-100)     | 82<br>(30-100)      | 66<br>(10-100)      | 60<br>(10-80)       | 43<br>(10-60)       | 58<br>(10-85)      | 52<br>(30-75)      | 34<br>(10-50)      | 90<br>(80-100)     |

**Table S2.** List of the observed bird species with their relative abundance and frequency of occurrence across all observation sites. Conservations status for each species is based on the The International Union for Conservation of Nature (IUCN) red list. Conservation status: LC = Least concern; NT=Near Threatened; VU = Vulnerable. Bird Category: S= Wetland specialist: G= Wetland generalist: A= Wetland associated.

| Code | Common name    | Scientific name                | Order           | Family     | Category | IUCN status | Frequency of occurrence (%) | Relative abundance (%) |
|------|----------------|--------------------------------|-----------------|------------|----------|-------------|-----------------------------|------------------------|
| 1    | African jacana | <i>Actophilornis africanus</i> | Charadriiformes | Jacaniidae | S        | LC          | 31.5                        | 4.5                    |

|    |                          |                                |                  |                   |   |    |      |     |
|----|--------------------------|--------------------------------|------------------|-------------------|---|----|------|-----|
| 2  | African fish eagle       | <i>Haliaeetus vocifer</i>      | Falconiformes    | Accipitridae      | S | LC | 5    | 0.1 |
| 3  | Black headed heron       | <i>Ardea melanocephala</i>     | Pelecaniformes   | Ardeidae          | S | LC | 26.5 | 0.9 |
| 4  | Black necked grebe       | <i>Podiceps nigricollis</i>    | Podicipediformes | Podicipedidae     | S | LC | 3.2  | 0.2 |
| 5  | Black tailed godwit      | <i>Limosa limosa</i>           | Charadriiformes  | Scolopacidae      | S | NT | 10.5 | 0.7 |
| 6  | Blue breasted kingfisher | <i>Halcyon malimbica</i>       | Coraciiformes    | Halcyonidae       | S | LC | 2.3  | 0.1 |
| 7  | Common moorhen           | <i>Gallinula chloropus</i>     | Gruiformes       | Rallidae          | S | LC | 4.6  | 0.2 |
| 8  | Common sandpiper         | <i>Actitis hypoleucos</i>      | Charadriiformes  | Scolopacidae      | S | LC | 17.4 | 1   |
| 9  | Common stilt             | <i>Himantopus himantopus</i>   | Charadriiformes  | Recurvirostridae  | S | LC | 7.8  | 0.4 |
| 10 | Fulvous whistling duck   | <i>Dendrocygna bicolor</i>     | Anseriformes     | Anatidae          | S | LC | 1.8  | 0.1 |
| 11 | Grey heron               | <i>Ardea cinerea</i>           | Pelecaniformes   | Ardeidae          | S | LC | 11.9 | 0.4 |
| 12 | Giant kingfisher         | <i>Megaceryle maxima</i>       | Coraciiformes    | Cerylidae         | S | LC | 2.7  | 0.1 |
| 13 | Hamerkop                 | <i>Scopus umbretta</i>         | Pelecaniformes   | Scopidae          | S | LC | 14.2 | 0.6 |
| 14 | Hottentot teal           | <i>Anas hottentota</i>         | Anseriformes     | Anatidae          | S | LC | 7.3  | 0.8 |
| 15 | Knob billed duck         | <i>Sarkidiomis melanotos</i>   | Anseriformes     | Anatidae          | S | LC | 27.9 | 2.6 |
| 16 | Lesser moorhen           | <i>Gallinula angulata</i>      | Gruiformes       | Rallidae          | S | LC | 2.7  | 0.1 |
| 17 | Little grebe             | <i>Tachybaptus ruficollis</i>  | Podicipediformes | Podicipedidae     | S | LC | 6.4  | 0.3 |
| 18 | Long tailed cormorant    | <i>Phalacrocorax africanus</i> | Pelicaniformes   | Phalacrocoracidae | S | LC | 9.1  | 0.4 |
| 19 | Malachite kingfisher     | <i>Alcedo cristatus</i>        | Coraciiformes    | Alcedinidae       | S | LC | 9.6  | 0.3 |
| 20 | Marsh sandpiper          | <i>Tringa stagnatilis</i>      | Charadriiformes  | Scolopacidae      | S | LC | 15.5 | 0.9 |

|    |                            |                                      |                 |                   |   |    |      |      |
|----|----------------------------|--------------------------------------|-----------------|-------------------|---|----|------|------|
| 21 | Northern shoveler          | <i>Spatula clypeata</i>              | Anseriformes    | Anatidae          | S | LC | 2.7  | 0.1  |
| 22 | Pink backed pelican        | <i>Pelecanus rufescens</i>           | Pelicaniformes  | Pelecanidae       | S | LC | 9.1  | 1    |
| 23 | Purple heron               | <i>Ardea purpurea</i>                | Ciconiformes    | Ardeidae          | S | LC | 2.7  | 0.1  |
| 24 | Saddle billed stork        | <i>Ephippiorhynchus senegalensis</i> | Ciconiformes    | Ciconidae         | S | LC | 9.6  | 0.4  |
| 25 | Squacco heron              | <i>Ardeola ralloides</i>             | Ciconiformes    | Ardeidae          | S | LC | 6.8  | 0.2  |
| 26 | White faced whistling duck | <i>Dendrocygna viduata</i>           | Anseriformes    | Anatidae          | S | LC | 24.2 | 3    |
| 27 | Wood sandpiper             | <i>Tringa glareola</i>               | Charadriiformes | Scolopacidae      | S | LC | 14.6 | 0.7  |
| 28 | Yellow billed duck         | <i>Anas undulate</i>                 | Anseriformes    | Anatidae          | S | LC | 42.5 | 6.3  |
| 29 | Yellow billed stork        | <i>Mycteria ibis</i>                 | Ciconiformes    | Ciconidae         | S | LC | 14.6 | 1.1  |
| 30 | African black duck         | <i>Anas sparsa</i>                   | Anseriformes    | Anatidae          | S | LC | 1.8  | 0.1  |
| 31 | African darter             | <i>Anhinga rufa</i>                  | Pelicaniformes  | Anhingidae        | S | LC | 1.8  | 0.1  |
| 32 | African snipe              | <i>Gallinago nigripennis</i>         | Charadriiformes | Scolopacidae      | S | LC | 0.5  | 0.1  |
| 33 | African spoonbill          | <i>Platalea alba</i>                 | Ciconiformes    | Threskiornithidae | S | LC | 1.4  | 0.1  |
| 34 | Eurasian spoonbill         | <i>Platalea leucorodia</i>           | Ciconiformes    | Threskiornithidae | S | LC | 1.8  | 0.1  |
| 35 | Mallard                    | <i>Anas platyrhynchos</i>            | Anseriformes    | Anatidae          | S | LC | 0.9  | <0.1 |
| 36 | Northern pintail           | <i>Anas acuta</i>                    | Anseriformes    | Anatidae          | S | LC | 0.9  | 0.1  |
| 37 | Temminck's stint           | <i>Calidris temminckii</i>           | Charadriiformes | Scolopacidae      | S | LC | 0.5  | 0.1  |
| 38 | White winged black tern    | <i>Chlidonias leucopetrus</i>        | Charadriiformes | Laridae           | S | LC | 1.4  | 0.1  |
| 39 | Southern pochard           | <i>Netta erythrophthalma</i>         | Anseriformes    | Anatidae          | S | LC | 0.5  | 0    |

|    |                           |                                 |                 |                   |   |    |      |     |
|----|---------------------------|---------------------------------|-----------------|-------------------|---|----|------|-----|
| 40 | Common bittern            | <i>Botaurus stellaris</i>       | Pelecaniformes  | Ardeidae          | S | LC | 0.5  | 0   |
| 41 | Black crane               | <i>Amauromis flavirostris</i>   | Gruiformes      | Rallidae          | G | LC | 2.7  | 0.1 |
| 42 | Black-crowned crane       | <i>Balearica pavonina</i>       | Gruiformes      | Gruidae           | G | VU | 26.9 | 1.5 |
| 43 | Egyptian goose            | <i>Alopochen aegyptiacus</i>    | Anseriformes    | Anatidae          | G | LC | 32   | 2.7 |
| 44 | Fan-tailed widow-bird     | <i>Euplectes axillaris</i>      | Passeriformes   | Ploceidae         | G | LC | 59.4 | 5.4 |
| 45 | Great white egret         | <i>Egretta alba</i>             | Ciconiformes    | Ardeidae          | G | LC | 16   | 1.1 |
| 46 | Little egret              | <i>Egretta garzetta</i>         | Ciconiformes    | Ardeidae          | G | LC | 11.4 | 0.6 |
| 47 | Marabou stork             | <i>Leptoptilos crumeniferus</i> | Ciconiformes    | Ciconidae         | G | LC | 2.3  | 0.5 |
| 48 | Pied kingfisher           | <i>Ceryle rudis</i>             | Coraciiformes   | Alcedinidae       | G | LC | 18.3 | 0.7 |
| 49 | Rouget's rail             | <i>Rougetius rougetii</i>       | Gruiformes      | Rallidae          | G | NT | 6.4  | 0.2 |
| 50 | Sacred ibis               | <i>Threskiomis aethiopicus</i>  | Ciconiformes    | Threskiornithidae | G | LC | 64.4 | 5.1 |
| 51 | Spur-winged lapwing       | <i>Vanellus spinosus</i>        | Charadriiformes | Charadriidae      | G | LC | 11   | 0.7 |
| 52 | Wattled crane             | <i>Grus carunculatus</i>        | Gruiformes      | Gruidae           | G | VU | 6.4  | 0.3 |
| 53 | Wattled ibis              | <i>Bostrychia carunculata</i>   | Ciconiformes    | Threskiornithidae | G | LC | 6.8  | 0.4 |
| 54 | Winding cisticola         | <i>Cisticola marginatus</i>     | Passeriformes   | Cisticolidae      | G | LC | 3.7  | 0.2 |
| 55 | Yellow-mantled widow-bird | <i>Euplectes macroura</i>       | Passeriformes   | Ploceidae         | G | LC | 13.2 | 0.9 |
| 56 | Yellow wag-tail           | <i>Motacilla flava</i>          | Passeriformes   | Motacillidae      | G | LC | 19.2 | 0.6 |
| 57 | Glossy ibis               | <i>Plegadis falcinellus</i>     | Ciconiformes    | Threskiornithidae | G | LC | 1.4  | 0   |
| 58 | Abyssinia ground hornbill | <i>Bucorvus abyssinicus</i>     | Coraciiformes   | Bucerotidae       | A | LC | 4.6  | 0.1 |

|    |                                |                               |                 |              |   |    |      |     |
|----|--------------------------------|-------------------------------|-----------------|--------------|---|----|------|-----|
| 59 | African citril                 | <i>Serinus citrinelloides</i> | Passeriformes   | Fringillidae | A | LC | 2.7  | 0.1 |
| 60 | African wattled<br>lapwing     | <i>Vanellus senegallus</i>    | Charadriiformes | Charadriidae | A | LC | 45.2 | 4.1 |
| 61 | African mourning<br>dove       | <i>Streptopelia decipiens</i> | Columbiformes   | Columbidae   | A | LC | 17.8 | 1.2 |
| 62 | African paradise<br>monarch    | <i>Terpsiphone viridis</i>    | Passeriformes   | Monarchidae  | A | LC | 13.2 | 0.6 |
| 63 | African rook                   | <i>Corvus frugilegus</i>      | Passeriformes   | Corvidae     | A | LC | 3.7  | 0.1 |
| 64 | Balagfecht weaver              | <i>Ploceus baglafecht</i>     | Passeriformes   | Ploceidae    | A | LC | 15.5 | 1   |
| 65 | Black kite                     | <i>Milvus migrans</i>         | Accipitriformes | Accipitridae | A | LC | 6.4  | 0.3 |
| 66 | Barn swallow                   | <i>Hirundo rustica</i>        | Passeriformes   | Hirundinidae | A | LC | 25.1 | 2.5 |
| 67 | Brown-throated sand-<br>martin | <i>Riparia paludicola</i>     | Passeriformes   | Hirundinidae | A | LC | 4.6  | 0.5 |
| 68 | Black-headed weaver            | <i>Ploceus melanocephalus</i> | Passeriformes   | Ploceidae    | A | LC | 24.7 | 3.9 |
| 69 | Blue-headed coucal             | <i>Centropus monachus</i>     | Cuculiformes    | Cuculidae    | A | LC | 24.7 | 1.1 |
| 70 | Blue-spotted wood<br>dove      | <i>Turtur afer</i>            | Columbiformes   | Columbidae   | A | LC | 2.7  | 0.1 |
| 71 | Bronze mannikin                | <i>Lonchura cucullata</i>     | Passeriformes   | Estrildidae  | A | LC | 29.2 | 1.6 |
| 72 | Brown-snake eagle              | <i>Circaetus cinereus</i>     | Accipitriformes | Accipitridae | A | LC | 2.7  | 0.1 |
| 73 | Cattle egret                   | <i>Bubulcus ibis</i>          | Ciconiformes    | Ardeidae     | A | LC | 57.5 | 8.3 |
| 74 | Common bulbul                  | <i>Pycnonotus barbatus</i>    | Passeriformes   | Pycnonotidae | A | LC | 6.4  | 0.7 |
| 75 | Common fiscal                  | <i>Lanius collaris</i>        | Passeriformes   | Laniidae     | A | LC | 11.9 | 0.2 |

|    |                                      |                                  |               |                   |   |    |      |     |
|----|--------------------------------------|----------------------------------|---------------|-------------------|---|----|------|-----|
| 76 | Copper sunbird                       | <i>Cinnyris cupreus</i>          | Passeriformes | Nectariniidae     | A | LC | 6.8  | 0.3 |
| 77 | Common waxbill                       | <i>Estrilda aestrild</i>         | Passeriformes | Estrildidae       | A | LC | 9.6  | 0.4 |
| 78 | Crested francolin                    | <i>Francolinus sephaena</i>      | Galliformes   | Phasianidae       | A | LC | 2.3  | 0.1 |
| 79 | Eastern plantain-eater               | <i>Crinifer zonurus</i>          | Cuculiformes  | Musophagidae      | A | LC | 8.2  | 0.3 |
| 80 | Fan-tailed raven                     | <i>Corvus rhipidurus</i>         | Passeriformes | Corvidae          | A | LC | 14.2 | 0.8 |
| 81 | Grey-backed fiscal                   | <i>Lanius excubitoroids</i>      | Passeriformes | Laniidae          | A | LC | 40.2 | 3   |
| 82 | Grey wood-pecker                     | <i>Mesopicos goertae</i>         | Piciformes    | Picidae           | A | LC | 2.7  | 0.1 |
| 83 | Helmented<br>guineaowl               | <i>Numida meleagris</i>          | Galliformes   | Numidae           | A | LC | 6.8  | 1.4 |
| 84 | Lesser-blue-eared<br>glossy Starling | <i>Lamprotornis chloropterus</i> | Passeriformes | Sturnidae         | A | LC | 15.1 | 1   |
| 85 | Long-tailed pipit                    | <i>Anthus similes</i>            | Passeriformes | Motacillidae      | A | NT | 2.3  | 0.1 |
| 86 | Hadada ibis                          | <i>Bostrychia hagedash</i>       | Ciconiformes  | Threskiornithidae | A | LC | 81.3 | 6.8 |
| 87 | Little Bee-eater                     | <i>Merops pusillus</i>           | Coraciiformes | Meropidae         | A | LC | 31.1 | 2   |
| 88 | Olive thrush                         | <i>Turdus olivaceus</i>          | Passeriformes | Turdidae          | A | LC | 3.2  | 0.2 |
| 89 | Pectoral patch<br>cisticola          | <i>Cisticola brunnescens</i>     | Cuculiformes  | Cisticolidae      | A | LC | 2.3  | 0.1 |
| 90 | Pintailed whydah                     | <i>Vidua macroura</i>            | Passeriformes | Viduidae          | A | LC | 15.1 | 0.5 |
| 91 | Red-billed firefinch                 | <i>Lagonosticta senegala</i>     | Passeriformes | Estrildidae       | A | LC | 9.6  | 0.3 |
| 92 | Red-eyed dove                        | <i>Streptopelia semitorquata</i> | Columbiformes | Columbidae        | A | LC | 21.5 | 1.3 |
| 93 | Richard's pipit                      | <i>Anthus richardi</i>           | Passeriformes | Motacillidae      | A | LC | 5.5  | 0.2 |
| 94 | Ring-necked dove                     | <i>Streptopelia capicola</i>     | Columbiformes | Columbidae        | A | LC | 5    | 0.2 |



|     |                             |                                   |               |                |   |    |      |      |
|-----|-----------------------------|-----------------------------------|---------------|----------------|---|----|------|------|
| 95  | Speckled-mousebird          | <i>Colius striatus</i>            | Coliiformes   | Collidae       | A | LC | 14.2 | 0.6  |
| 96  | Speckled pigeon             | <i>Columba guinea</i>             | Columbiformes | Columbidae     | A | LC | 4.6  | 0.3  |
| 97  | Stout cisticola             | <i>Cisticola robustus</i>         | Passeriformes | Cisticolidae   | A | LC | 13.7 | 1.5  |
| 98  | Tambourine dove             | <i>Turtur tympanistria</i>        | Columbiformes | Columbidae     | A | LC | 5.5  | 0.3  |
| 99  | Thick-billed raven          | <i>Corvus crassirostris</i>       | Passeriformes | Corvidae       | A | LC | 3.2  | 0.1  |
| 100 | Tropical boubou             | <i>Laniarius aethiopicus</i>      | Passeriformes | Malaconotidae  | A | LC | 3.7  | 0.2  |
| 101 | Variable sunbird            | <i>Cinnyris venustus</i>          | Passeriformes | Nectariniidae  | A | LC | 7.3  | 0.3  |
| 102 | Woodland king-fisher        | <i>Halcyon senegalensis</i>       | Coraciiformes | Alcedinidae    | A | LC | 7.3  | 0.3  |
| 103 | Abdim's stork               | <i>Ciconia abdimii</i>            | Ciconiiformes | Ciconidae      | A | LC | 0.5  | <0.1 |
| 104 | Sedge warbler               | <i>Acrocephalus schoenobaenus</i> | Passeriformes | Acrocephalidae | A | LC | 0.5  | <0.1 |
| 105 | Abyssinia ground thrush     | <i>Geokichla piaggiae</i>         | Passeriformes | Turdidae       | A | LC | 0.5  | <0.1 |
| 106 | Abyssinian long claw        | <i>Macronyx flavicollis</i>       | Passeriformes | Motacillidae   | A | NT | 0.5  | <0.1 |
| 107 | Abyssinian slaty flycatcher | <i>Melaenornis chocolatinus</i>   | Passeriformes | Muscicapidae   | A | LC | 1.8  | 0.1  |
| 108 | Abyssinian white-eye        | <i>Zosterops abyssinicus</i>      | Passeriformes | Zosteropidae   | A | LC | 0.5  | <0.1 |
| 109 | African firefinch           | <i>Lagonosticta rubricata</i>     | Passeriformes | Estrildidae    | A | LC | 0.5  | <0.1 |
| 110 | African thrush              | <i>Turdus pelios</i>              | Passeriformes | Turdidae       | A | LC | 1.4  | <0.1 |
| 111 | Yellow-throated warbler     | <i>Setophaga dominica</i>         | Passeriformes | Parulidae      | A | LC | 1.4  | 0.1  |
| 112 | Black-billed bustard        | <i>Eupodotis melanogaster</i>     | Gruiformes    | Otididae       | A | LC | 0.9  | <0.1 |
| 113 | Black bishop                | <i>Euplectes gierowii</i>         | Passeriformes | Ploceidae      | A | LC | 1.4  | 0.1  |

|     |                                |                               |                 |               |   |    |     |      |
|-----|--------------------------------|-------------------------------|-----------------|---------------|---|----|-----|------|
| 114 | Black-headed batis             | <i>Batis minor</i>            | Passeriformes   | Muscicapidae  | A | LC | 0.9 | <0.1 |
| 115 | Western banded snake eagle     | <i>Circaetus cinerascens</i>  | Accipitriformes | Accipitridae  | A | LC | 1.4 | <0.1 |
| 116 | Cardinal wood-pecker           | <i>Dendropicos fuscescens</i> | Piciformes      | Picidae       | A | LC | 0.5 | <0.1 |
| 117 | Cinnamon breasted rock bunting | <i>Emberiza tahapisi</i>      | Passeriformes   | Emberizidae   | A | LC | 1.4 | 0.1  |
| 118 | Common camaroptera             | <i>Camaroptera brachyura</i>  | Passeriformes   | Cisticolidae  | A | LC | 1.4 | <0.1 |
| 119 | Common stonechat               | <i>Saxicola torquatus</i>     | Passeriformes   | Muscicapidae  | A | LC | 0.5 | <0.1 |
| 120 | Greenbul                       | <i>Andropadus importunus</i>  | Passeriformes   | Pycnonotidae  | A | LC | 1.4 | 0.2  |
| 121 | Green-throated Sunbird         | <i>Chalcomitra rubescens</i>  | Passeriformes   | Nectariniidae | A | LC | 1.8 | 0.1  |
| 122 | Grey- headed Sparrow           | <i>Passer griseus</i>         | Passeriformes   | Ploceidae     | A | LC | 0.5 | <0.1 |
| 123 | Hemprich's hornbill            | <i>Tockus hemprichii</i>      | Coraciiformes   | Bucerotidae   | A | LC | 1.4 | <0.1 |
| 124 | Heuglin's robinchat            | <i>Cossypha heuglini</i>      | Passeriformes   | Turdidae      | A | LC | 0.9 | <0.1 |
| 125 | Hoopoe                         | <i>Upupa epops</i>            | Coraciiformes   | Upupidae      | A | LC | 0.5 | <0.1 |
| 126 | Lesser grey shrike             | <i>Lanius minor</i>           | Passeriformes   | Laniidae      | A | LC | 0.5 | <0.1 |
| 127 | Little greenbul                | <i>Eurillas virens</i>        | Passeriformes   | Pycnonotidae  | A | LC | 0.5 | <0.1 |
| 128 | Little-rush warbler            | <i>Bradypterus baboecala</i>  | Passeriformes   | Locustellidae | A | LC | 0.5 | <0.1 |
| 129 | Marico sunbird                 | <i>Cinnyris mariquensis</i>   | Passeriformes   | Locustellidae | A | LC | 0.5 | <0.1 |

|     |                            |                                 |               |               |   |    |     |      |
|-----|----------------------------|---------------------------------|---------------|---------------|---|----|-----|------|
| 130 | Northern wheatear          | <i>Oenanthe oenanthe</i>        | Passeriformes | Muscicapidae  | A | LC | 0.9 | <0.1 |
| 131 | Red-backed shrike          | <i>Lanius collurio</i>          | Passeriformes | Laniidae      | A | LC | 0.9 | <0.1 |
| 132 | Red-billed oxpecker        | <i>Buphagus erithrorhynchus</i> | Passeriformes | Sturnidae     | A | LC | 1.4 | <0.1 |
| 133 | Red-checked cordon<br>bleu | <i>Uraeginthus bengalus</i>     | Passeriformes | Estrildidae   | A | LC | 0.9 | <0.1 |
| 134 | Red-headed quelea          | <i>Quelea erythrops</i>         | Passeriformes | Ploceidae     | A | LC | 0.5 | <0.1 |
| 135 | Red-tailed wheatear        | <i>Oenanthe chrysopygia</i>     | Passeriformes | Muscicapidae  | A | LC | 0.9 | <0.1 |
| 136 | Scarlet-chested<br>sunbird | <i>Nectarinia senegalensis</i>  | Passeriformes | Nectariniidae | A | LC | 0.9 | <0.1 |
| 137 | Senegal coucal             | <i>Centropus senegalensis</i>   | Cuculiformes  | Cuculidae     | A | LC | 1.4 | <0.1 |
| 138 | Village indigobird         | <i>Vidua chalybeate</i>         | Passeriformes | Ploceidae     | A | LC | 0.9 | <0.1 |
| 139 | Wire-tailed swallow        | <i>Hirundo smithii</i>          | Passeriformes | Hirundinidae  | A | LC | 0.5 | <0.1 |
| 140 | White-collared pigeon      | <i>Columba albitorques</i>      | Columbiformes | Columbidae    | A | LC | 0.9 | 0.3  |

**Table S3.** Criteria and ordinal scale used to quantify the magnitude of different types of human disturbance in close proximity of each sampling site.

| Human disturbance    | score = 1                       | score = 2                       | score = 3                                |
|----------------------|---------------------------------|---------------------------------|------------------------------------------|
| Cattle grazing       | minimal grazing                 | moderate grazing                | intensive grazing                        |
| Vegetation clearance | >10% vegetation removal         | 10-50% of vegetation removal    | >50% of vegetation removal               |
| Tree plantation      | no plantation in >50m perimeter | plantation in >50m perimeter    | plantation in wetland                    |
| Crop farming         | no farming in >50m perimeter    | farming in >50 m perimeter      | farming in wetland                       |
| Clay mining          | no clay mining                  | clay mining in >50 m perimeter  | clay mining in wetland or >50m perimeter |
| Waste dumping        | no waste dumping                | water dumping near wetland      | waste dumping in wetland                 |
| Ditching             | no ditching                     | ditching within >50 m perimeter | ditching in wetland                      |
| Filling              | no filling                      | filling near wetland            | filling in wetland                       |
| Draining             | no draining                     | draining within >50 m perimeter | draining in wetland                      |

## SUPPLEMENTARY FIGURES

### A. Wetland specialist community

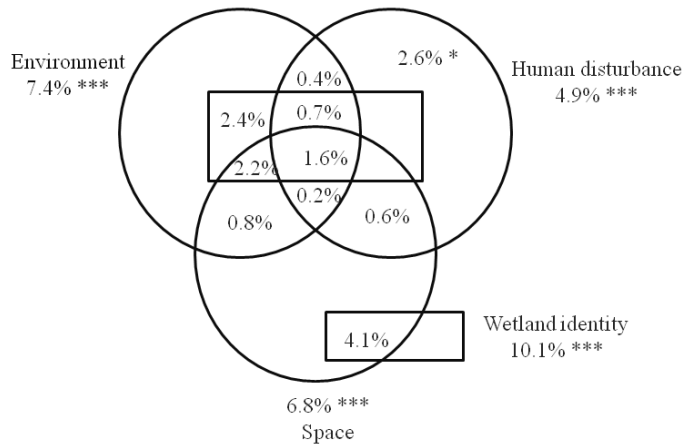

### B. Wetland generalist community

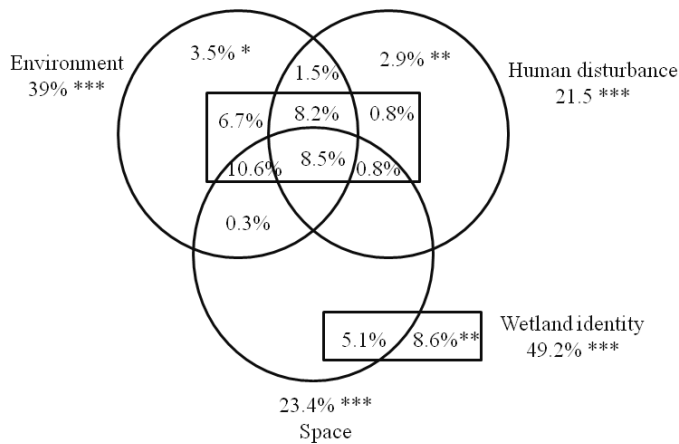

### C. Wetland associated community

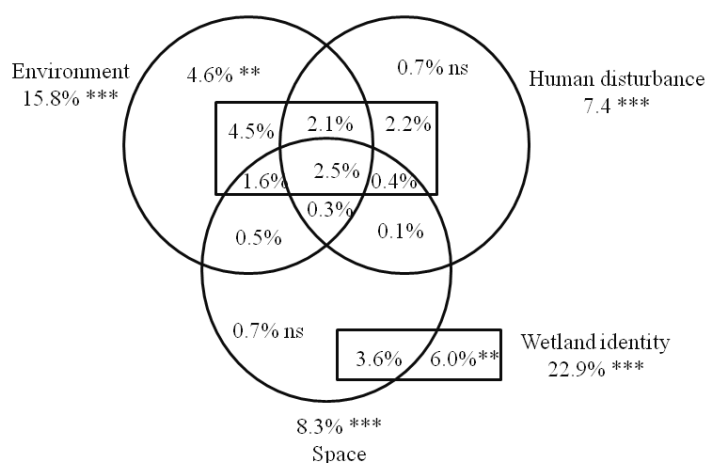

**Figure S1.** Results of variation partitioning analyses on the community composition of (A) wetland specialist, (B) wetland generalist and (C) wetland associated birds with environment (E), human disturbance (H), space (S) and wetland identity (W) as explanatory variables. Percentages represent the adjusted  $R^2$ .  $R^2_{adj}$ . Values  $< 0$  are not mentioned. 'ns' not significant, '\*'  $p < 0.05$ , '\*\*'  $p < 0.01$ , '\*\*\*'  $p < 0.001$ ). Note that the significance of shared fractions cannot be tested.
